# Supplementary material for: Biocide-Resistant Escherichia coli ST540 Co-Harboring ESBL, dfrA14 Confers QnrS-Dependent Plasmid-Mediated Quinolone Resistance
Source: MDPI journal article supplement (doi:10.3390/antibiotics11121724), 2022-11-30
Supplement: s1 [file s1]

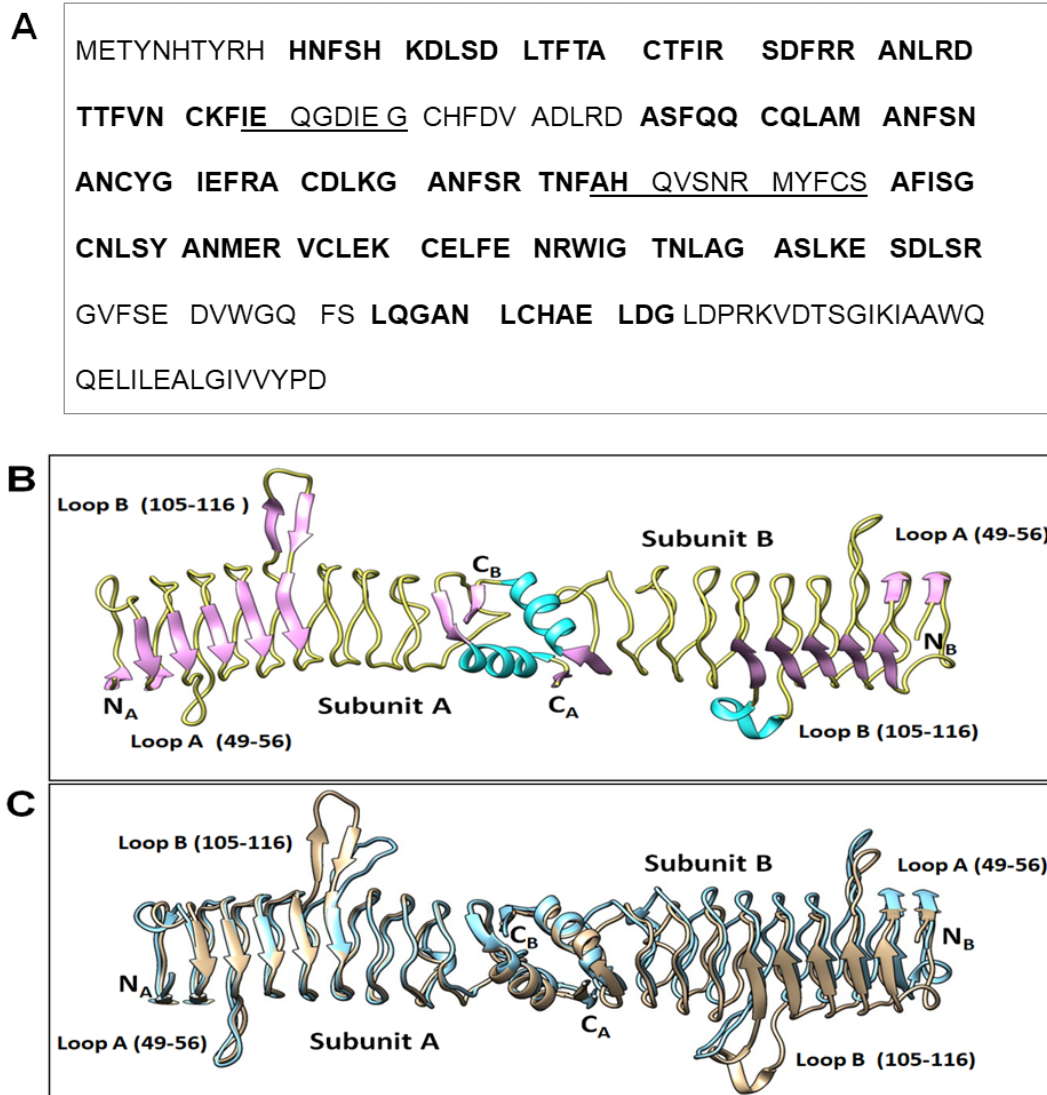

**Figure S1.** Sequence and homology modelling of QnrS.

- A. Amino acid sequence of ECU32 QnrS1 display the consensus sequence of S/T/A/V/C-D/N-L/F-S/T/R-G, pentapeptide repeating unit residues shown as bold face and the underlined residues indicate loop regions of A and B.
- B. Homology model of homodimer ECU32 QnrS1 using template of QnrB1 (PDB: 2xtx.1)
- C. Superimposition of modeled homodimer ECU32 QnrS1 (light orange color) with AhQnr (light blue color), the Qnr protein from *Aeromonas hydrophila* (PDB:3psz.1).
